# Supplementary material for: Castration Induces Down-Regulation of A-Type K+ Channel in Rat Vas Deferens Smooth Muscle
Source: MDPI journal article supplement (doi:10.3390/ijms20174073), 2019-08-21
Supplement: s1 [file s1]

## Supplementary Materials

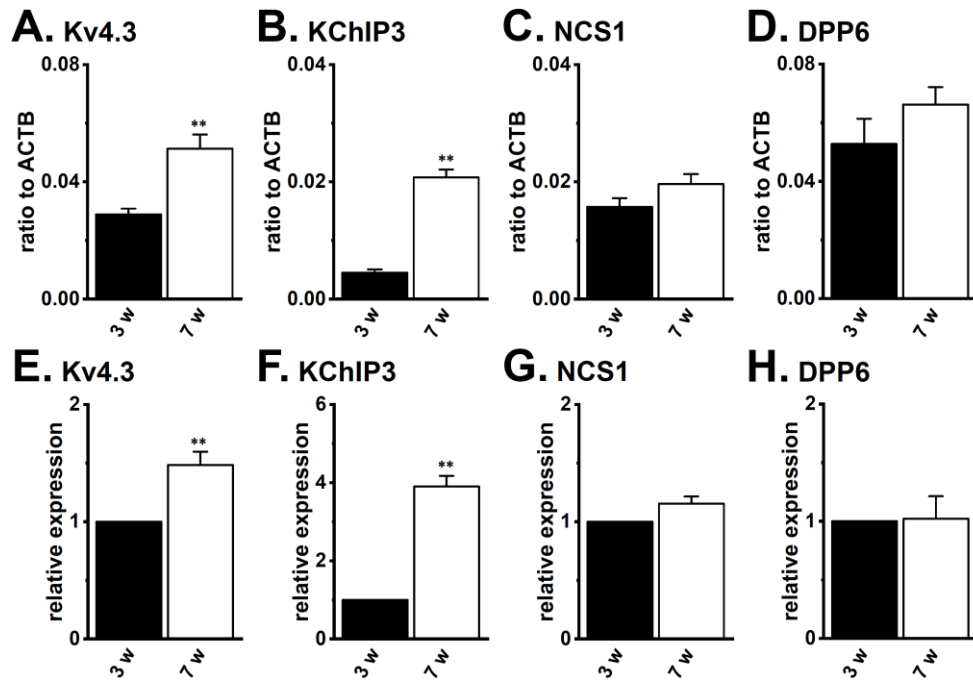

**Supplementary Figure S1.** Developmental changes in Kv4.3 and KChIP3 expression levels. A-D: The expression of Kv4.3, KChIP3, NCS1, and DPP6-S transcripts in the VDSMs of 3- and 7-week-old rats was examined using a real-time PCR assay. Values are shown for steady-state transcripts relative to ACTB in the same preparation. A: Kv4.3, B: KChIP3, C: NCS1, D: DPP6-S ( $n = 6$  for each). \*\*:  $p < 0.01$  vs. 3-week-old. E-H: The expression of Kv4.3, KChIP3, NCS1, and DPP6-S proteins in the VDSMs of 3- and 7-week-old rats was examined by Western blotting. Values were expressed as a ratio versus those in 3-week-old rats. E: Kv4.3, F: KChIP3, G: NCS1, H: DPP6-S ( $n = 4$  for each). The significance of differences between two groups was evaluated by the Student's  $t$ -test, after the  $F$  test. \*\*:  $p < 0.01$  vs. 3-week-old.
